# Supplementary material for: (−)-Lariciresinol Isolated from the Roots of Isatis indigotica Fortune ex Lindl. Inhibits Hepatitis B Virus by Regulating Viral Transcription
Source: MDPI journal article supplement (doi:10.3390/molecules27103223), 2022-05-18
Supplement: s1 [file s1]

# Supplementary Material

The structural information and LC-MS analysis of (-)-lariciresinol are as follows:

(-)-lariciresinol was obtained as white amorphous powder.  $^1\text{H}$  NMR ( $\text{CD}_3\text{OD}$ , 500 MHz)  $\delta$  6.85 (d,  $J$  = 1.5 Hz, 1H), 6.71 (m, 2H), 4.69 (d,  $J$  = 7.0 Hz, 1H), 2.32 (m, 1H), 3.78 (1H), 3.57 (dd,  $J$  = 11.0, 3.5 Hz, 1H), 6.74 (d,  $J$  = 1.5 Hz, 1H), 6.65 (m, 1H), 6.58 (dd,  $J$  = 8.0, 1.5 Hz, 1H), 2.87 (dd,  $J$  = 13.5, 4.5 Hz, 1H), 2.43 (dd,  $J$  = 11.0, 13.5 Hz, 1H), 2.67 (m, 1H), 3.92 (dd,  $J$  = 8.0, 6.0 Hz, 1H), 3.67 (dd,  $J$  = 8.0, 4.0 Hz, 1H), 3.78 (3H), 3.77 (3H);  $^{13}\text{C}$  NMR ( $\text{CD}_3\text{OD}$ , 125 MHz)  $\delta$  137.5, 110.5, 149.0, 147.0, 116.0, 119.8, 84.0, 54.1, 60.4, 133.5, 113.3, 149.0, 145.8, 116.2, 122.2, 33.6, 43.9, 73.5, 56.3; HRMS: calcd for  $\text{C}_{20}\text{H}_{24}\text{O}_6\text{Na}$   $[\text{M} + \text{Na}]^+$ : 383.1462, found: 383.1465.

## Thermo Qexactive Focus Report

compound MI-54a  
Method : LCMS(compound)-low

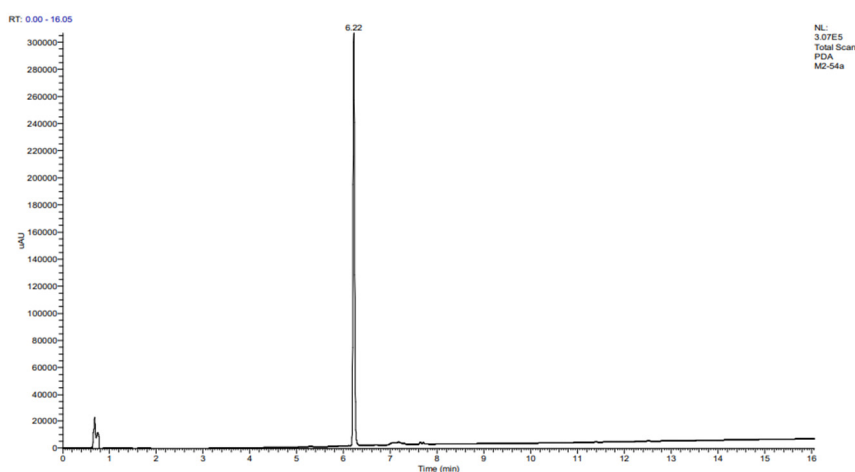

### PEAK LIST

M2-54a.raw

RT: 0.00 - 16.05

Number of detected peaks: 2

| Apex RT | Start RT | End RT | Area    | %Area | Height  | %Height |
|---------|----------|--------|---------|-------|---------|---------|
| 6.22    | 6.15     | 6.37   | 748810  | 90.08 | 305982  | 99.11   |
| 7.17    | 6.96     | 7.84   | 82492.3 | 9.92  | 2733.82 | 0.89    |

Figure S1: The LC-MS analysis of (-)-LRSL.

The structural information and LC-MS analysis of (–)-lariciresinol-4,4'-bis-*O*- $\beta$ -D-glucopyranoside are as follows:

(–)-lariciresinol-4,4'-bis-*O*- $\beta$ -D-glucopyranoside was obtained as white amorphous powder.  $^1\text{H}$  NMR ( $\text{DMSO-}d_6$ , 600 MHz)  $\delta$ : 7.01 (d,  $J$  = 8.4 Hz, 1H), 6.97 (d,  $J$  = 8.4 Hz, 1H), 6.88 (d,  $J$  = 1.8 Hz, 1H), 6.81 (d,  $J$  = 1.8 Hz, 1H), 6.77 (dd,  $J$  = 8.4, 1.8 Hz, 1H), 6.67 (dd,  $J$  = 8.4, 1.8 Hz, 1H), 4.85 (d,  $J$  = 7.2 Hz, 1H), 4.82 (d,  $J$  = 7.2 Hz, 1H), 4.71 (d,  $J$  = 4.8 Hz, 1H), 3.89 (t,  $J$  = 7.2 Hz, 1H), 3.74 (s, 6H), 3.69–3.64 (m, 3H), 3.56 (t,  $J$  = 7.2 Hz, 1H), 3.49–3.42 (m, 3H), 3.29–3.23 (m, 6H), 3.17–3.13 (m, 2H), 2.84 (dd,  $J$  = 13.8, 4.2 Hz, 1H), 2.60 (m, 1H), 2.48 (m, 1H), 2.20 (t,  $J$  = 7.2 Hz, 1H); HRMS: calcd for  $\text{C}_{32}\text{H}_{44}\text{O}_{16}\text{Na}$   $[\text{M} + \text{Na}]^+$ : 707.2525, found: 707.2522.

### Thermo Qexactive Focus Report

compound      **wl-6-14-t3b**  
Method :        **LCMS(compou**

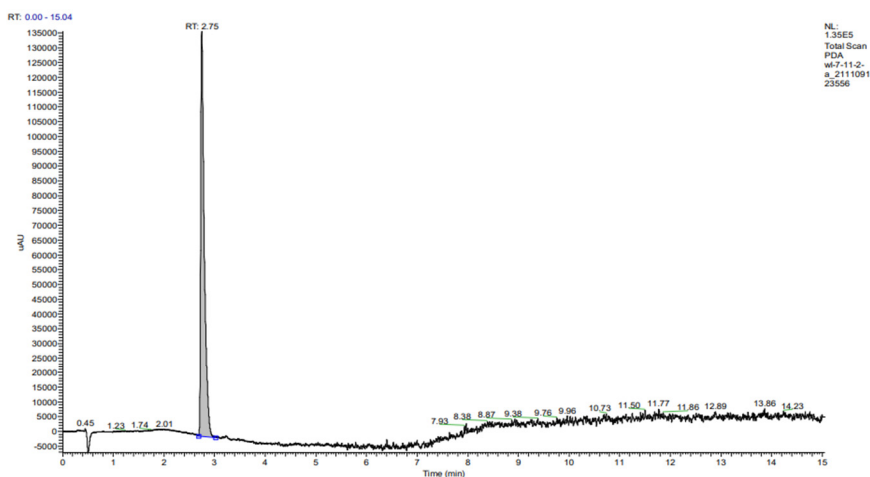

#### PEAK LIST

wl-7-11-2-a\_211109123556.raw

RT: 0.00 - 15.04

Number of detected peaks: 1

| Apex RT | Start RT | End RT | Area   | %Area | Height | %Height |
|---------|----------|--------|--------|-------|--------|---------|
| 2.75    | 2.68     | 3.02   | 670994 | 100   | 137130 | 100     |

Figure S2: The LC-MS analysis of (–)-lariciresinol-4,4'-bis-*O*- $\beta$ -D-glucopyranoside.

The structural information and LC-MS analysis of (–)-lariciresinol-4-*O*-β-D-glucopyranoside are as follows:

(–)-lariciresinol-4-*O*-β-D-glucopyranoside was obtained as white amorphous powder. <sup>1</sup>H NMR (DMSO-*d*<sub>6</sub>, 500 MHz) δ: 8.67 (s, 1H), 7.01 (d, *J* = 8.4 Hz, 1H), 6.88 (s, 1H), 6.77 (dd, *J* = 8.4, 1.8 Hz, 1H), 6.73 (s, 1H), 6.66 (d, *J* = 7.8 Hz, 1H), 6.56 (d, *J* = 7.8 Hz, 1H), 4.85 (d, *J* = 7.0 Hz, 1H), 3.88 (dd, *J* = 7.5, 6.5 Hz, 1H), 3.69–3.64 (m, 2H), 3.56 (dd, *J* = 8.0, 7.0 Hz, 1H), 3.50–3.40 (m, 2H), 3.27–3.20 (m, 3H), 3.16 (m, 1H), 2.80 (dd, *J* = 13.5, 4.5 Hz, 1H), 2.60 (m, 1H), 2.57 (m, 1H), 2.16 (m, 1H); HRMS: calcd for C<sub>26</sub>H<sub>33</sub>O<sub>11</sub> [M – H]<sup>–</sup>: 521.2031, found: 521.2028.

### Thermo Qexactive Focus Report

**compound**      **wl-6-14-t3a**  
**Method :**        **LCMS(compou**

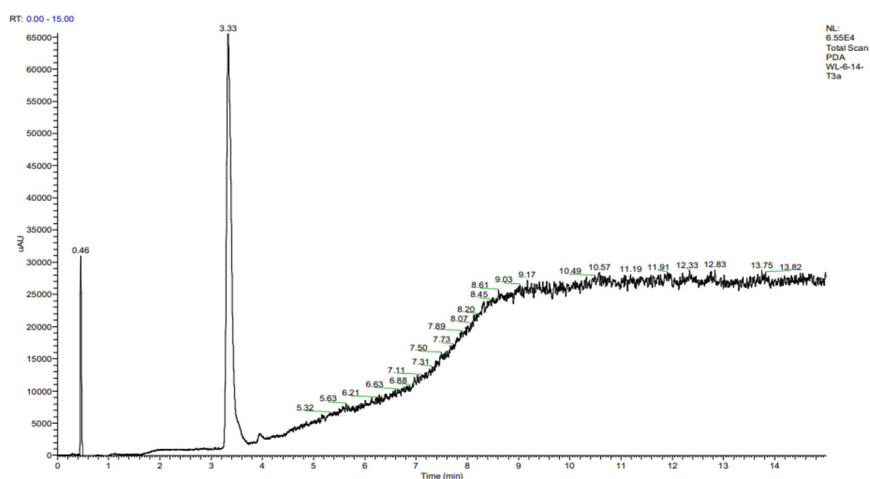

#### PEAK LIST

WL-6-14-T3a.raw

RT: 0.00 - 15.00

Number of detected peaks: 2

| Apex RT | Start RT | End RT | Area    | %Area | Height  | %Height |
|---------|----------|--------|---------|-------|---------|---------|
| 3.33    | 3.2      | 3.69   | 445233  | 97.56 | 64322.3 | 97.67   |
| 3.95    | 3.89     | 4.13   | 11130.3 | 2.44  | 1537.49 | 2.33    |

**Figure S3:** The LC-MS analysis of (–)-lariciresinol-4-*O*-β-D-glucopyranoside.

The structural information and LC-MS analysis of lariciresinol-4'-O- $\beta$ -D-glucopyranoside are as follows:

lariciresinol-4'-O- $\beta$ -D-glucopyranoside was obtained as white amorphous powder.  $^1\text{H}$  NMR ( $\text{CD}_3\text{OD}$ , 500 MHz)  $\delta$  6.93 (d,  $J$  = 2.0 Hz, 1H), 7.07 (d,  $J$  = 8.5 Hz, 1H), 6.82 (dd,  $J$  = 8.5, 2.0 Hz, 1H), 4.77 (m, 1H), 2.29 (m, 1H), 3.77 (1H), 3.59 (dd,  $J$  = 11.0, 7.0 Hz, 1H), 6.73 (d,  $J$  = 2.0 Hz, 1H), 6.65 (d,  $J$  = 8.0 Hz, 1H), 6.58 (dd,  $J$  = 8.0, 2.0 Hz, 1H), 2.85 (dd,  $J$  = 13.5, 5.0 Hz, 1H), 2.44 (dd,  $J$  = 13.5, 9.0 Hz, 1H), 2.66 (m, 1H), 3.94 (dd,  $J$  = 8.0, 6.5 Hz, 1H), 3.68 (dd,  $J$  = 8.0, 6.0 Hz, 1H), 4.82 (d,  $J$  = 7.0 Hz, 1H), 3.38-3.45 (m, 2H), 3.31-3.37 (m, 2H), 3.81 (1H), 3.63 (m, 1H), 3.80 (3H), 3.77 (1H); HRMS: calcd for  $\text{C}_{26}\text{H}_{33}\text{O}_{11}$   $[\text{M} - \text{H}]^-$ : 521.2032, found: 521.2028.

### Thermo Qexactive Focus Report

compound      **wl-6-14-t3b**  
Method :      **LCMS(compou**

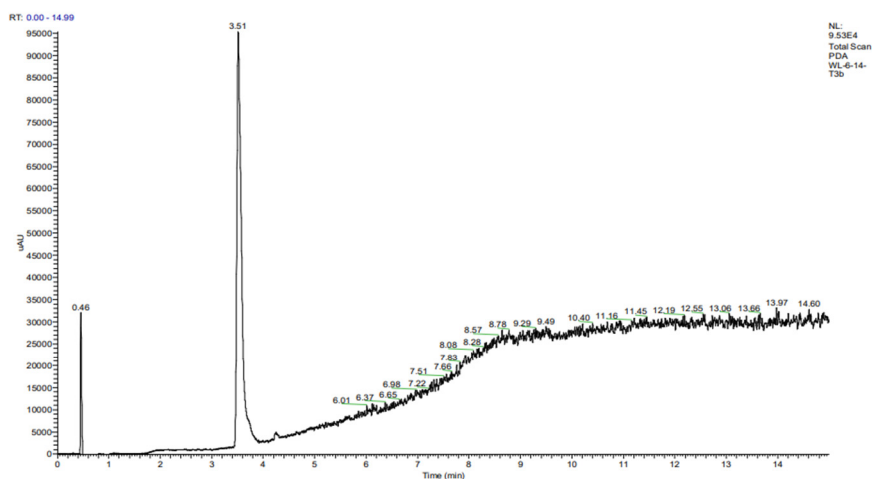

#### PEAK LIST

WL-6-14-T3b.raw

RT: 0.00 - 14.99

Number of detected peaks: 2

| Apex RT | Start RT | End RT | Area    | %Area | Height  | %Height |
|---------|----------|--------|---------|-------|---------|---------|
| 3.51    | 3.42     | 3.92   | 599184  | 98.16 | 93677   | 97.69   |
| 4.25    | 4.21     | 4.36   | 11221.3 | 1.84  | 2214.02 | 2.31    |

Figure S4: The LC-MS analysis of lariciresinol-4'-O- $\beta$ -D-glucopyranoside.
